# Supplementary material for: Bridging the chasm between patients’ needs and current rehabilitation care: perceptions of adults presenting for primary care in the Eastern Cape
Source: PubMed Central journal article supplement (PMC10840242; doi:10.1186/s12913-024-10564-5), 2024-02-05
Supplement: 12913_2024_10564_MOESM1_ESM.pdf [file 12913_2024_10564_MOESM1_ESM.pdf]

## Additional file 1.pdf: Demographic Data and Health Information Collection Form (Adults at PHC)

Data collection instrument to capture patients' socio-demographic and relevant clinical history.

| <b>DEMOGRAPHIC INFORMATION</b>                                                                                  |                                                 |                                                                                            |                                           |
|-----------------------------------------------------------------------------------------------------------------|-------------------------------------------------|--------------------------------------------------------------------------------------------|-------------------------------------------|
| <b>Surname:</b>                                                                                                 | <b>First name:</b>                              | <b>Title:</b>                                                                              | <b>Respondent</b> (patient or caregiver): |
| <b>Date of birth (dd/mm/yy):</b> _ _ / _ _ / _ _                                                                |                                                 | <b>Gender:</b> <input type="checkbox"/> female <input type="checkbox"/> male               |                                           |
| <b>Preferred language:</b>                                                                                      |                                                 | <b>Marital status:</b> <input type="checkbox"/> married <input type="checkbox"/> unmarried |                                           |
| <b>Section 2: Contact Details</b>                                                                               |                                                 |                                                                                            |                                           |
| <b>Mobile phone (if any):</b>                                                                                   |                                                 | <b>House phone (if any):</b>                                                               |                                           |
| <b>E-mail address (if any):</b>                                                                                 |                                                 |                                                                                            |                                           |
| <b>Caregiver (name and contact information):</b><br>*For patients only                                          |                                                 |                                                                                            |                                           |
| <b>Section 3: Address</b>                                                                                       |                                                 |                                                                                            |                                           |
| <b>Name of City or Town where you live:</b>                                                                     |                                                 |                                                                                            |                                           |
| <b>Name of Suburb or Area where you live:</b>                                                                   |                                                 |                                                                                            |                                           |
| <b>Section 3: Education History</b>                                                                             |                                                 |                                                                                            |                                           |
| <b>Highest education/academic level you have achieved:</b> (for example, standard or grade completed at school) |                                                 |                                                                                            |                                           |
| <b>Years of formal education:</b>                                                                               |                                                 |                                                                                            |                                           |
| <b>Section 4: Employment &amp; Finances</b>                                                                     |                                                 |                                                                                            |                                           |
| <b>Are you currently employed?</b>                                                                              |                                                 | <input type="checkbox"/> Yes                                                               | <input type="checkbox"/> No               |
| <b>If YES, please describe your job/work:</b>                                                                   |                                                 |                                                                                            |                                           |
| <b>If NO, please describe your previous job/work:</b>                                                           |                                                 |                                                                                            |                                           |
| <b>If NO, please tell us when you stopped working:</b>                                                          |                                                 |                                                                                            |                                           |
| <b>Source of Income now – check <i>all that apply</i>:</b>                                                      |                                                 |                                                                                            |                                           |
| <input type="checkbox"/> Salary/Wages                                                                           | <input type="checkbox"/> Grants                 | <input type="checkbox"/> Remittances (Gift)                                                |                                           |
| <input type="checkbox"/> Pension                                                                                | <input type="checkbox"/> Income from a business | <input type="checkbox"/> Other (explain):<br>.....                                         |                                           |

**Section 4: Medical Diagnosis of existing Main Health Conditions**

1. No medical condition exists

2.

3.

4.

5. A health condition (disease, disorder, injury) exists; however, nature or diagnosis is not known

**BRIEF HEALTH INFORMATION:**

X1. Height: \_\_\_\_\_ cm

X2. Weight: \_\_\_\_\_ kg

X3. Dominant hand (prior to health condition):  Left  Right  Both hands equallyX4. How do you rate your physical health in the past month? Very good  Good  Moderate  Bad  Very badX5. How do you rate your mental and emotional health in the past month? Very good  Good  Moderate  Bad  Very badX6. Do you currently have any disease(s) or disorder(s)?  Yes  No*If YES, please specify:*X7. Did you ever have any significant injuries that had an impact on your level of functioning?  Yes  No*If YES, please specify:*X8. Have you been hospitalized in the last year?  Yes  No*If YES, please specify reasons and for how long?*X9. Are you taking any medication (either prescribed or over the counter)?  Yes  No*If YES, please specify major medications?*X10. Do you smoke?  Yes  NoX11. Do you consume alcohol or drugs?  Yes  NoX13. Do you use any assistive devices such as glasses, hearing aids, wheelchairs, etc.?  Yes  No*If YES, please specify:*X14. Do you have any person assisting you with your self-care, shopping, or other daily activities?  Yes  No*If YES, please specify person and assistance they provide:*X15. Are you receiving any kind of treatment for your health?  Yes  No*If YES, please specify:*X15. Have you received any rehabilitation for your health?  Yes  No*If YES, please specify:*

|                                                                                                                                                                                                                                                          |                                                                                       |
|----------------------------------------------------------------------------------------------------------------------------------------------------------------------------------------------------------------------------------------------------------|---------------------------------------------------------------------------------------|
| X16. Additional significant information on your past and present health:                                                                                                                                                                                 |                                                                                       |
| X17. IN THE PAST MONTH, have you been totally unable to carry out your usual activities or work because of your health condition? (a disease, injury, emotional reasons or alcohol or drug use) <input type="checkbox"/> Yes <input type="checkbox"/> No |                                                                                       |
| If YES, how many days?                                                                                                                                                                                                                                   |                                                                                       |
| X18. IN THE PAST MONTH, have you been totally unable to carry out your usual activities or work because of your health condition? (a disease, injury, emotional reasons or alcohol or drug use) <input type="checkbox"/> Yes <input type="checkbox"/> No |                                                                                       |
| If YES, how many days?                                                                                                                                                                                                                                   |                                                                                       |
| If any of the following apply to you, please tick the box                                                                                                                                                                                                |                                                                                       |
| <input type="checkbox"/> D1 Visual impairment                                                                                                                                                                                                            | <input type="checkbox"/> D8 Mental health issues e.g., worrying, feeling sad          |
| <input type="checkbox"/> D2 Communication problems e.g., talking and hearing                                                                                                                                                                             | <input type="checkbox"/> D9 Difficulty with self-care e.g., dressing, bathing, eating |
| <input type="checkbox"/> D3 Mobility problems                                                                                                                                                                                                            | <input type="checkbox"/> D10 Difficulty with performing household chores              |
| <input type="checkbox"/> D4 Muscle function problems                                                                                                                                                                                                     | <input type="checkbox"/> D11 Weight problems                                          |
| <input type="checkbox"/> D5 Joint function problems                                                                                                                                                                                                      | <input type="checkbox"/> D12 Sexual problems                                          |
| <input type="checkbox"/> D6 Problems with your chest or breathing                                                                                                                                                                                        | <input type="checkbox"/> D13 Learning/ work difficulty                                |
| <input type="checkbox"/> D7 Emotional /behavioral difficulties                                                                                                                                                                                           | <input type="checkbox"/> D14 Pain in any part of your body                            |
| <input type="checkbox"/> Other disability, <i>please specify</i> :                                                                                                                                                                                       |                                                                                       |
| <b>For administrative use only:</b>                                                                                                                                                                                                                      | <b>Questionnaire number: APHC-____</b>                                                |
